# Supplementary material for: The human 18S rRNA base methyltransferases DIMT1L and WBSCR22-TRMT112 but not rRNA modification are required for ribosome biogenesis
Source: PubMed Central journal article supplement — Mol Biol Cell. 2015 Jun 1;26(11):2080–95. doi: 10.1091/mbc.E15-02-0073 (PMC4472018; doi:10.1091/mbc.e15-02-0073), 2015-06-01
Supplement: supp_E15-02-0073v1_CombinedSupMats.pdf [file supp_E15-02-0073v1_CombinedSupMats.pdf]

# Supplemental Materials

*Molecular Biology of the Cell*

Zorbas et al.

FIGURE S1

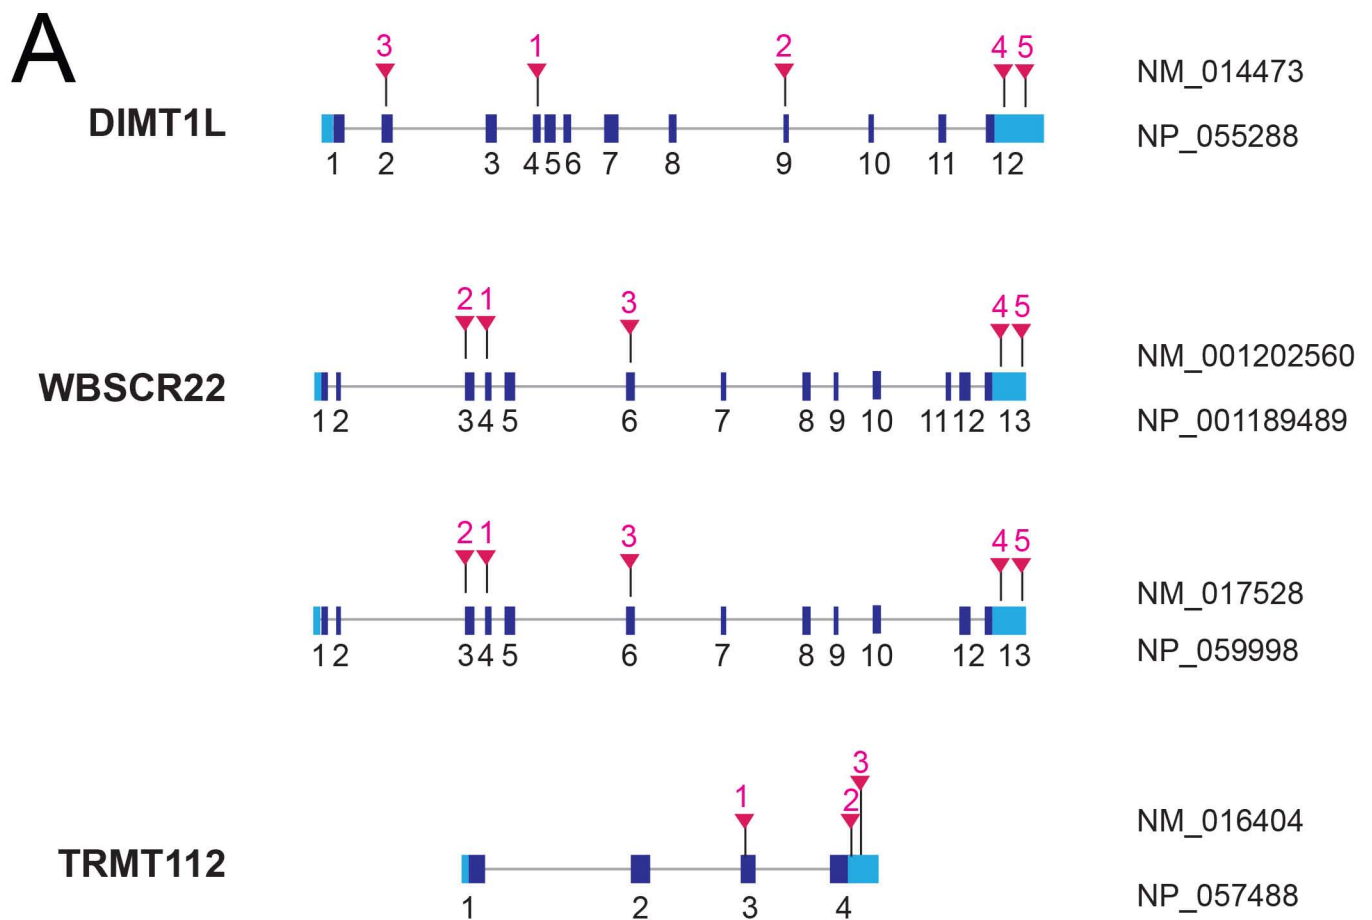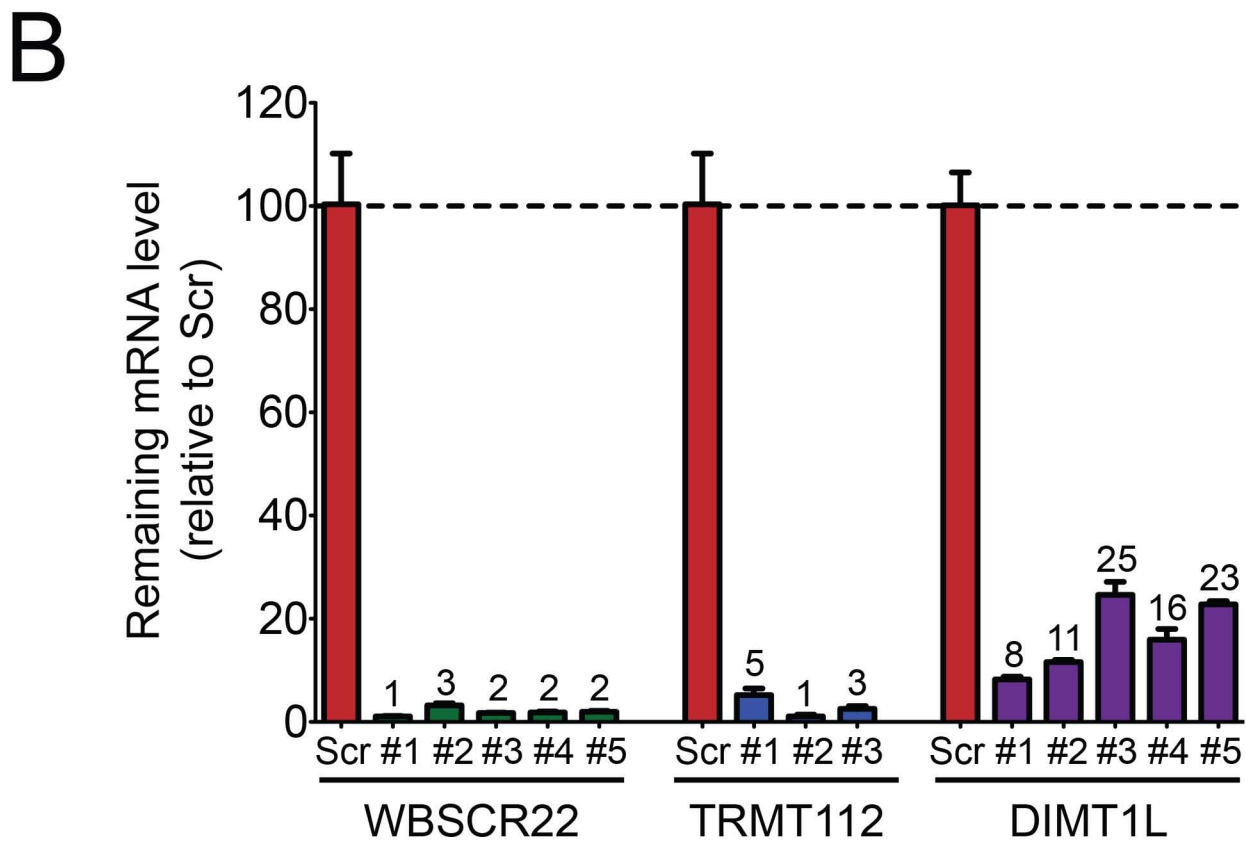

# FIGURE S2

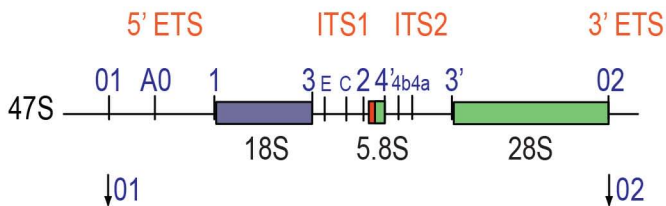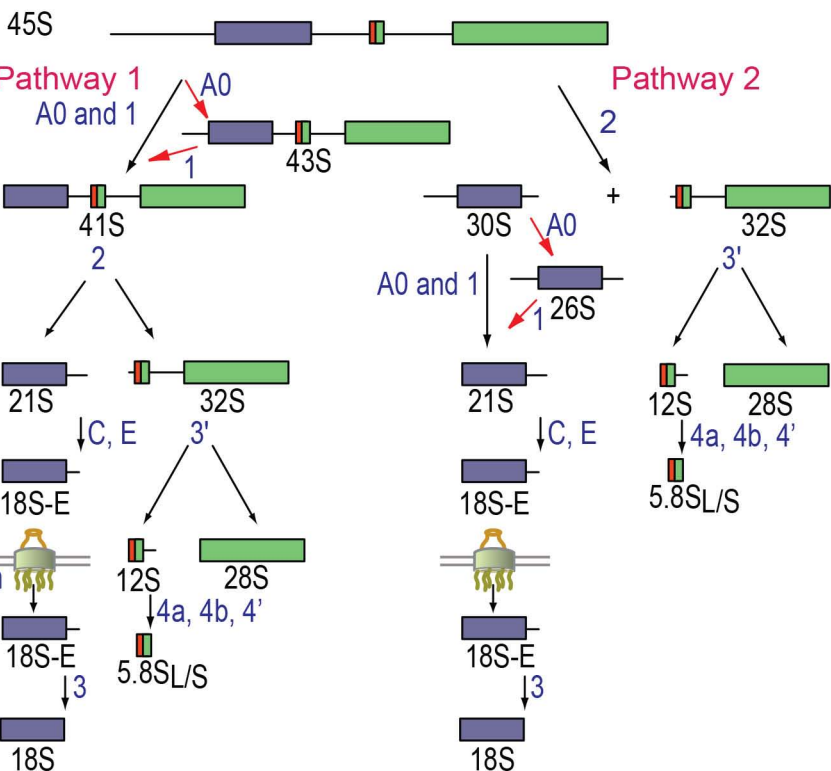

FIGURE S3

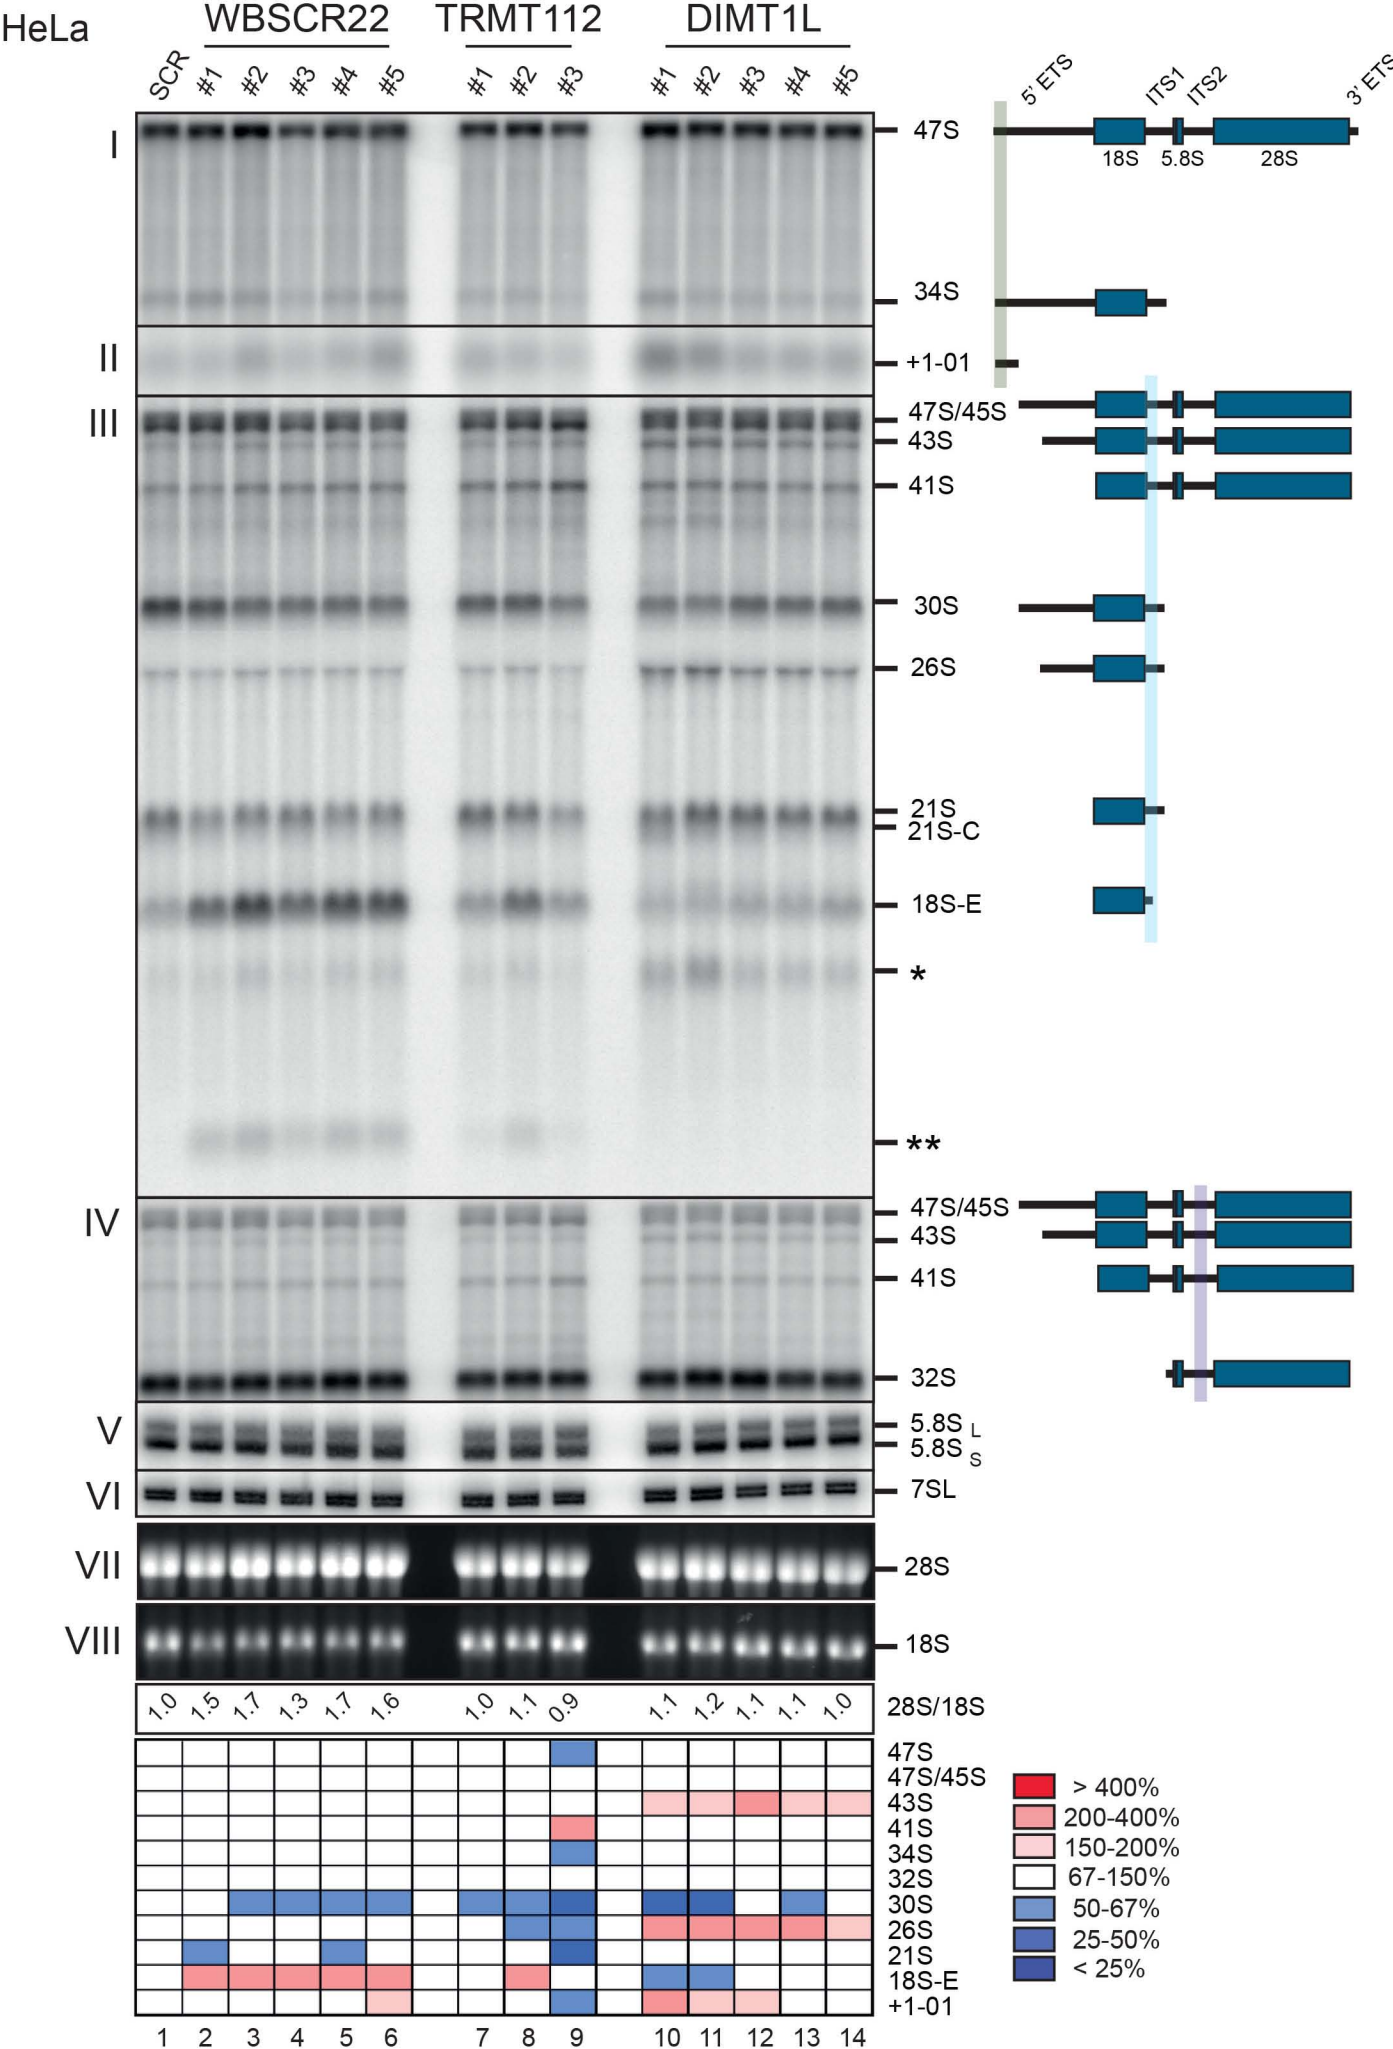

FIGURE S4

A

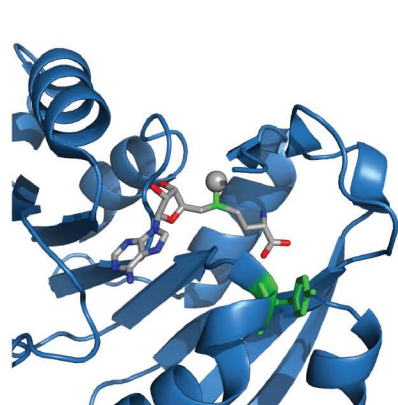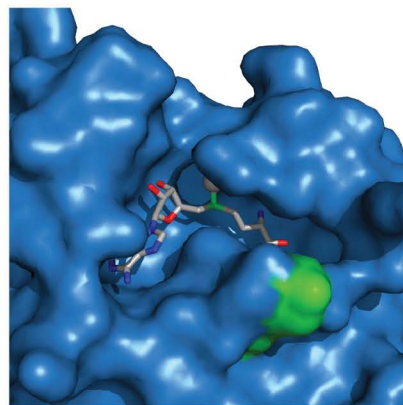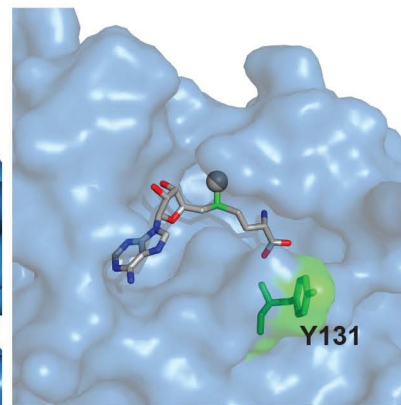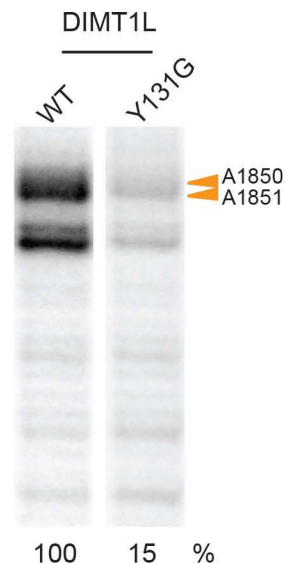

Dim1 (yeast) --YFDICISNTPYQISSPLVFKL--  
 DIMT1L (human) --FFDTCVANLPYQISSPFVFKL--  
 Identity: 71%

B

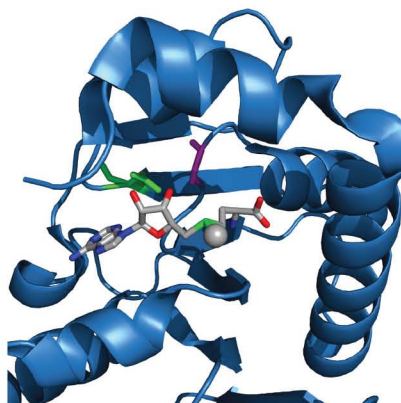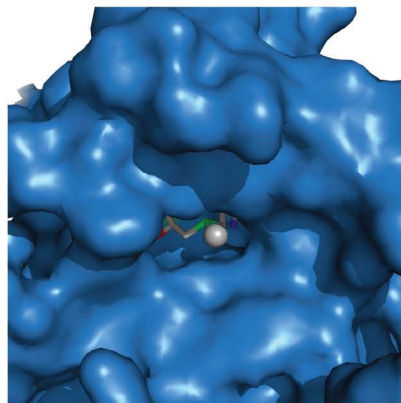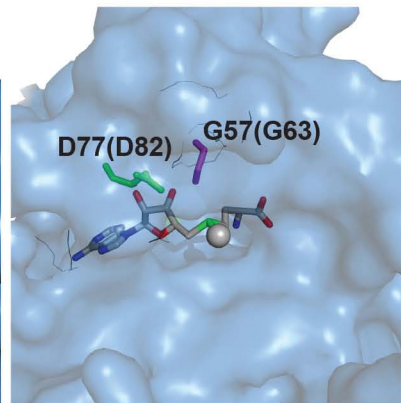

Bud23 (yeast) --PCSFILDIGCGSGLSGEILTOEGDHVWCGLDISPSMLATGL--  
 WBSCR22 (human) --PC-YLLDIGCGTGLSGSYLSDEG-HYWVGLDISPAMIDEAV--  
 Identity: 66%

**Fig S1: Positions of siRNAs on transcripts targeted in this work, and siRNA-mediated depletion efficiency**

**A,** The regions targeted by the siRNAs on mature mRNAs are shown on the structure of the pre-mRNAs. Exons are shown as blue boxes, introns as thin black lines. The 5' and 3' UTR elements are in cyan. There are two known isoforms of WBSCR22; both are targeted by the siRNAs used. siRNAs, depicted as red arrowheads, are numbered from 1 to 5.

**B,** The level of residual mRNAs was tested by qRT-PCR on total RNA extracted from HeLa cells incubated for 3 d with each siRNA. The signal was normalized to GAPDH, and expressed with respect to a nontargeting (Scr) control.

**Fig S2: Simplified pre-rRNA processing pathway in human cells**

Three of the four mature rRNAs, the 18S, 5.8S, and 28S rRNAs are produced from a single RNA Pol I transcript (47S). The 18S rRNA is the RNA component of the small subunit (40S); 5.8S and 28S are incorporated into the large subunit (60S). There is a third rRNA in the 60S subunit, 5S, which is independently produced by RNA Pol III (not shown). The mature sequences are embedded in noncoding 5' and 3' external transcribed spacers (ETS) and internal transcribed spacers (ITS1 and 2). Cleavage sites (in blue) and alternative pathways are indicated. For details, see [www.ribosomesynthesis.com](http://www.ribosomesynthesis.com) and ref. Mullineux and Lafontaine, 2012.

**Fig S3: Pre-rRNA processing of HeLa cells depleted of WBSCR22, TRMT112, or DIMIT1L**

Total RNA extracted from HeLa cells treated for 3 d with an siRNA specific to the indicated target was resolved on a denaturing agarose gel and analyzed by northern blotting with specific oligonucleotide probes. Five distinct siRNAs (#1 to #5) were used for DIMIT1L and WBSCR22 and three for TRMT112 (see Fig S1 and Table S3). A non-targeting control (SCR) was used as control. The positions of the probes used and the pre-rRNA intermediates detected are indicated to the right of the northern-blot panels. Detection of the RNA component of the signal recognition particle (7SL) was used as a loading control (panel VI). The probes used were as follows: panels I and II, LD1844; panel III, LD1827; panel IV, LD1828; panel V, probe LD2132; panel VI, probe LD2133. The mature 18S and 28S rRNAs were visualized by ethidium bromide staining of the agarose gel (panels VII and VIII). The mature 28S/18S ratio was calculated from Agilent Bioanalyzer electropherograms. The major pre-rRNA intermediates detected were quantitated with a Phosphorimager and represented as a heatmap with a color code indicating the respective abundances normalized with respect to the SCR control. Note that the 12S, 7S, and 5.8S+40 RNAs were detected and quantified, but are not shown for the sake of simplicity.

**Fig S4: 3-D representations of the SAM binding pocket area of human DIMIT1L and yeast Bud23**

The models illustrate the positions of the mutated residues in the catalytic pocket of each methyltransferase. From left to right: ribbon representation, surface rendering, and surface rendering with transparency. SAM and the residues mutated in this work are highlighted and shown as sticks. The carbon atoms of SAM are shown in light grey and the methyl group transferred during the methylation reaction as a grey sphere. Conservation between the yeast and human proteins in the area targeted by mutagenesis is illustrated by pairwise alignments underneath. The sequence identity percentages are indicated.

**A, Human DIMT1L** (model based on PDB entry 1ZQ9): residue Y131, in the immediate vicinity of SAM, is indicated in green. Right panel, the residual dimethylation activity in HCT116 cells expressing the Y131G catalytically deficient allele of DIMT1L was estimated to be of ~15%.

**B, Yeast Bud23** (model based on PDB entry 4QTU, see L  toquart *et al.*, 2014): residues D77 and G57, lining the SAM binding site, are shown in green and purple, respectively. The equivalent residues in human are numbered in brackets.

## SUPPLEMENTAL TABLES

**TABLE S1: plasmids**

| Plasmid name                                      | insert                                    | Marker, origin of replication                                                                                                | Reference                                |
|---------------------------------------------------|-------------------------------------------|------------------------------------------------------------------------------------------------------------------------------|------------------------------------------|
| pET11a(His <sub>6</sub> -WBSCR22) = <b>pVH475</b> | (His)6-WBSCR22 expressed from T7 promoter | Ap, Kn colE1 <i>E. coli</i> origin                                                                                           | This study                               |
| pACYC-Duet-1 (hTrm112) = <b>pFFh5</b>             | TRMT112 expressed from T7 promoter        | Ap, Kn, p15A <i>E. coli</i> origin                                                                                           | [1]                                      |
| <b>pDL0737</b>                                    | WBSCR22                                   | in pDONR223                                                                                                                  | ORFeome, Prof Vidal (Harvard University) |
| <b>pDL0811</b>                                    | pcDNA5-Flag                               | For tet-inducible Flag-Precision cleavage site-His-amino ter-tagged constructs                                               | Gift from Prof Watkins (U. Newcastle)    |
| <b>pDL0846</b>                                    | DIMT1L                                    | in pDONR223                                                                                                                  | ORFeome, Prof Vidal (Harvard University) |
| <b>pDL0886</b>                                    | pcDNA5-Flag-DIMT1L-siRNAr-wt              | A PCR fragment generated with oligonucleotides LD2819 and LD2820 on pDL0846 was cloned as a BamHI/XhoI fragment into pDL0811 | This study                               |
| <b>pDL0887</b>                                    | pcDNA5-Flag-DIMT1L-siRNAr-Y131G           | Generated as pDL0886                                                                                                         | This study                               |
| <b>pDL0888</b>                                    | pcDNA5-Flag-WBSCR22-siRNAr-wt             | A PCR fragment generated with oligonucleotides LD2817 and LD2818 on pDL0737 was cloned as a BamHI/XhoI fragment into pDL0811 | This study                               |
| <b>pDL0889</b>                                    | pcDNA5-Flag-WBSCR22-                      | Generated as pDL0888                                                                                                         | This study                               |

|                |                                      |                      |            |
|----------------|--------------------------------------|----------------------|------------|
|                | siRNAr-G63E                          |                      |            |
| <b>pDL0890</b> | pcDNA5-Flag-WBSCR22-siRNAr-D82K      | Generated as pDL0888 | This study |
| <b>pDL0891</b> | pcDNA5-Flag-WBSCR22-siRNAr-G63E/D82K | Generated as pDL0888 | This study |

**TABLE S2: oligonucleotides used for cloning purposes**

| Name            | Sequence                                                        | Used for:                                      |
|-----------------|-----------------------------------------------------------------|------------------------------------------------|
| <b>H6wbNdeI</b> | GTACAAAAAAGTTCATATGCACCACCACCACCACGCGTCGCGCGGCCGGCGTCC          | overexpress His6-WBSCR22 in bacteria           |
| <b>wbBglII</b>  | ACAAGAGATCTGATTAGAAGCGGGGCTTGC                                  | overexpress His6-WBSCR22 in bacteria           |
| <b>LD2797</b>   | GATACTTGTGTGGCAAATTTGCCTGGACAGATCTCTTCGCCTTTTGCTTC              | DIMT1L Y131G FP                                |
| <b>LD2798</b>   | GAAGACAAAAGGCGAAGAGATCTGTCCAGGCAAATTTGCCACACAAGTATC             | DIMT1L Y131G RP                                |
| <b>LD2161</b>   | GCTGGATATTGGCTGTGAGACTGGGCTGAGTGAAG                             | WBSCR22 G63E FP                                |
| <b>LD2162</b>   | CTTCCACTCAGCCCAGTCTCACAGCCAATATCCAGC                            | WBSCR22 G63E RP                                |
| <b>LD2163</b>   | CTATTGGGTGGGCCTGAAAATCAGCCCTGCCATGC                             | WBSCR22 D82K FP                                |
| <b>LD2164</b>   | GCATGGCAGGGCTGATTTTCAGGCCACCCAATAG                              | WBSCR22 D82K RP                                |
| <b>LD2665</b>   | ACTGGGCTGTCTGGTTCTTACTTATCAGATGAAGG                             | WBSCR22 s41529 siRNA silent mutation FP        |
| <b>LD2666</b>   | CCTTCATCTGATAAGTAAGAACCAGACAGCCCAAGT                            | WBSCR22 s41529 siRNA silent mutation RP        |
| <b>LD2667</b>   | CACCCATCAATTTTCAGGAATGGGACGGCCTGGTGAGAATCACCTTTGTTAGAAAAACAAGAC | DIMT1L s26097 siRNA silent mutation FP         |
| <b>LD2668</b>   | GTCTTGTTTTTCCTAACAAAGGTGATTCTCACCAGGCCGTCCTTCTGAAAATTGATGGGTG   | DIMT1L s26097 siRNA silent mutation RP         |
| <b>LD2815</b>   | CTCTTTTTTCTGTTCTCGTCCGGGGTAGTCGAGCTGTCCTGCAGCTGTACCC            | BamH1 cloning site removal from WBSCR22 ORF FP |
| <b>LD2816</b>   | GGGTACAGCTGCAGGACAGCTCGACTACCCCGGACGAGAACAGAAAAAGAG             | BamH1 cloning site removal from WBSCR22 ORF RP |
| <b>LD2817</b>   | CACCATCACCATGGATCCATGGCGTCGCGCGGCCGG                            | Cloning WBSCR22 into pCDNA5 FP                 |
| <b>LD2818</b>   | GCTAGATCTAGACTCGAGCTAGAAGCGGGGCTTGCGC                           | Cloning WBSCR22 into pCDNA5 RP                 |
| <b>LD2819</b>   | CACCATCACCATGGATCCATGCCGAAGGTCAAGTCG                            | Cloning DIMT1L into pCDNA5 FP                  |
| <b>LD2820</b>   | GCTAGATCTAGACTCGAGCTAGGAAAAATGAATACCTTCTGC                      | Cloning DIMT1L into pCDNA5 RP                  |

**TABLE S3: siRNAs used in this work**

| Lab ref      | target    | Lifetech Ref | Sense sequence |
|--------------|-----------|--------------|----------------|
| <b>LD035</b> | SCRAMBLED | s4390844     | undisclosed    |

|       |           |          |                       |
|-------|-----------|----------|-----------------------|
| LD020 | WBSCR22#1 | s41529   | GAGUGGAAGUUAUCUGUCAtt |
| LD021 | WBSCR22#2 | s41530   | GCAACUCACGGAUGAUUGAtt |
| LD022 | WBSCR22#3 | s41531   | CAAGAAGUCUGAAAACCCUtt |
| LD023 | WBSCR22#4 | s445233  | CUGACAAAGUAGUAUUUUAtt |
| LD024 | WBSCR22#5 | s445234  | AAUGUUUUUCUGCAGUAAAtt |
| LD068 | TRMT112#1 | s28228   | GGCCGGUUGAGGGAUAUGAtt |
| LD027 | TRMT112#2 | s28229   | GUUUUUUGUUGAUCUAUAtt  |
| LD026 | TRMT112#3 | s445236  | CAAUGACACCAAACACAGUtt |
| LD069 | DIMT1L#1  | s26096   | GGCUAGUAGCUGAACUUCAtt |
| LD070 | DIMT1L#2  | s26097   | GGAUGGUCUAGUAAGGAUAtt |
| LD071 | DIMT1L#3  | s26098   | GGAGGACUCAUGUUAACAtt  |
| LD072 | DIMT1L#4  | ACD007RR | AGCCGCAGAGACGCACAAtt  |
| LD073 | DIMT1L#5  | ACD007RS | CCUUUAGCUCUGUUCUCUtt  |
|       | PNO1#2    | s32352   | CCAAGGAUGUAGUGCUCUtt  |

**TABLE S4: oligonucleotides used for RNA Northern blotting, primer extension analysis, and qRT-PCR**

**Northern-blots:**

|        |                                                   |         |
|--------|---------------------------------------------------|---------|
| LD1827 | CCTCGCCCTCCGGGCTCCGTTAATGATC                      | 5'ITS-1 |
| LD1828 | CTGCGAGGGAACCCCAAGCCGCGCA                         | ITS-2   |
| LD1844 | CGGAGGCCCAACCTCTCCGACGACAGGTCCGAGAGGACAGCGTGTGACG | 5'ETS   |
| LD2079 | GGGGCGATTGATCGGCAAGCGACGCTC                       | 5'ITS-2 |
| LD2133 | GCTCCGTTTCCGACCTGGGCC                             | 7SL     |
| LD2132 | CAATGTGTCCTGCAATTCAC                              | 5.8S    |

**Primer extension:**

|        |                          |                                                                                           |
|--------|--------------------------|-------------------------------------------------------------------------------------------|
| LD2120 | GTACAAAGGGCAGGGACTTAATC  | map m <sup>7</sup> G <sub>1639</sub>                                                      |
| LD2122 | GCCCTCCGGGCTCCGTTAATGATC | map m <sup>7</sup> G <sub>1639</sub>                                                      |
| LD2141 | CGAGCGAGCGAACGAACGGGC    | map 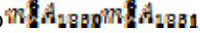 |
| LD2165 | GGCTTAATTTGACTCAACACGG   | sequencing ladder                                                                         |
| LD2166 | GAACGAACGAGCGAGCGAAC     | sequencing ladder                                                                         |

**qRT-PCR:**

|        |                      |            |
|--------|----------------------|------------|
| LD2476 | CACTGGGCTGAGTGGAAGTT | WBSCR22 FP |
| LD2477 | TTACAGAGCCACTGCACAGC | WBSCR22 RP |
| LD2472 | CTGTGGAATTCAACCCCAAC | TRMT112 FP |
| LD2473 | GGTGCCCTCTATCACTTCCA | TRMT112 RP |
| LD1818 | TGCACCACCAACTGCTTAGC | GAPDH FP   |
| LD1819 | GTTGAGCTCAGGGATGACC  | GAPDH RP   |
| LD2637 | AGAGAATTTGCCCTCCGACT | DIMT1L FP  |
| LD2638 | CCTGAAAATTGATGGGTGGT | DIMT1L RP  |
| LD2530 | CACCATGCCTGGCTAATTTT | PNO1 FP    |
| LD2531 | GTATGGCCAAACCACTGCT  | PNO1 RP    |

**REFERENCES**

[1] Figaro S, Scrima N, Buckingham RH, Heurgue-Hamard V. HemK2 protein, encoded on human chromosome 21, methylates translation termination factor eRF1. FEBS letters. 2008;582:2352-6.
